# Supplementary material
Source: PubMed Central journal article supplement (PMC8375397)

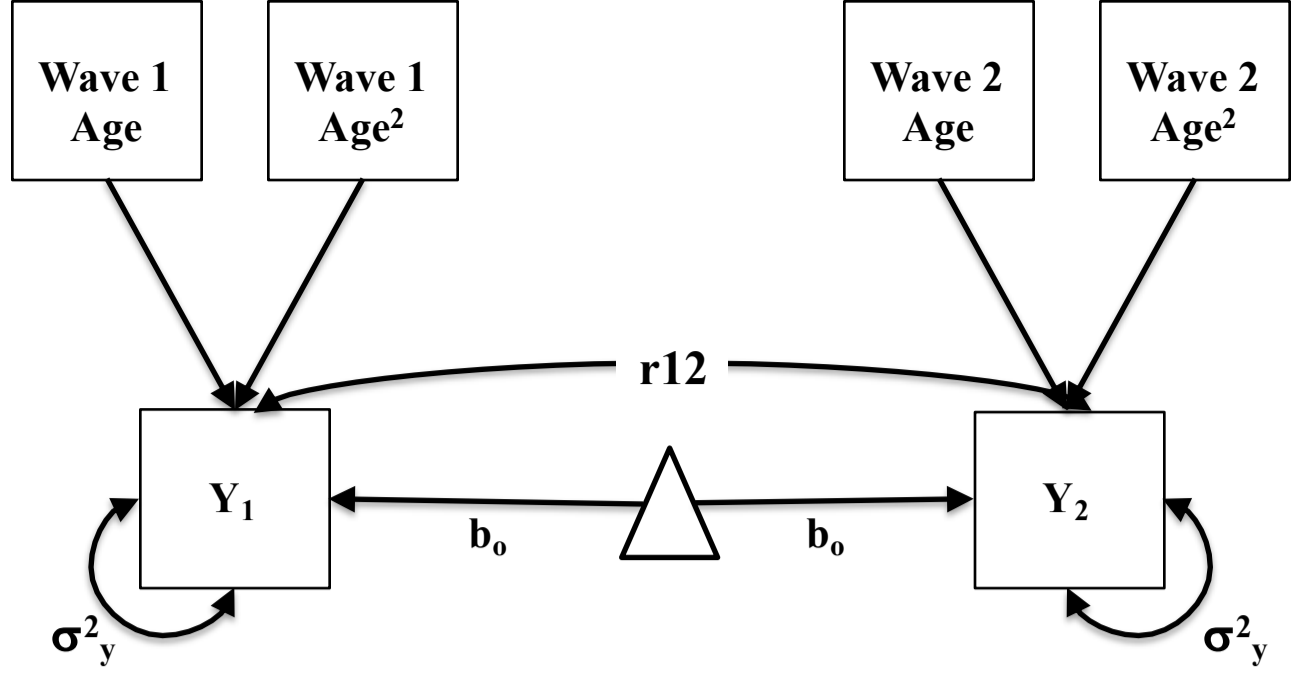

**A: No Age-Related Change in Stability**

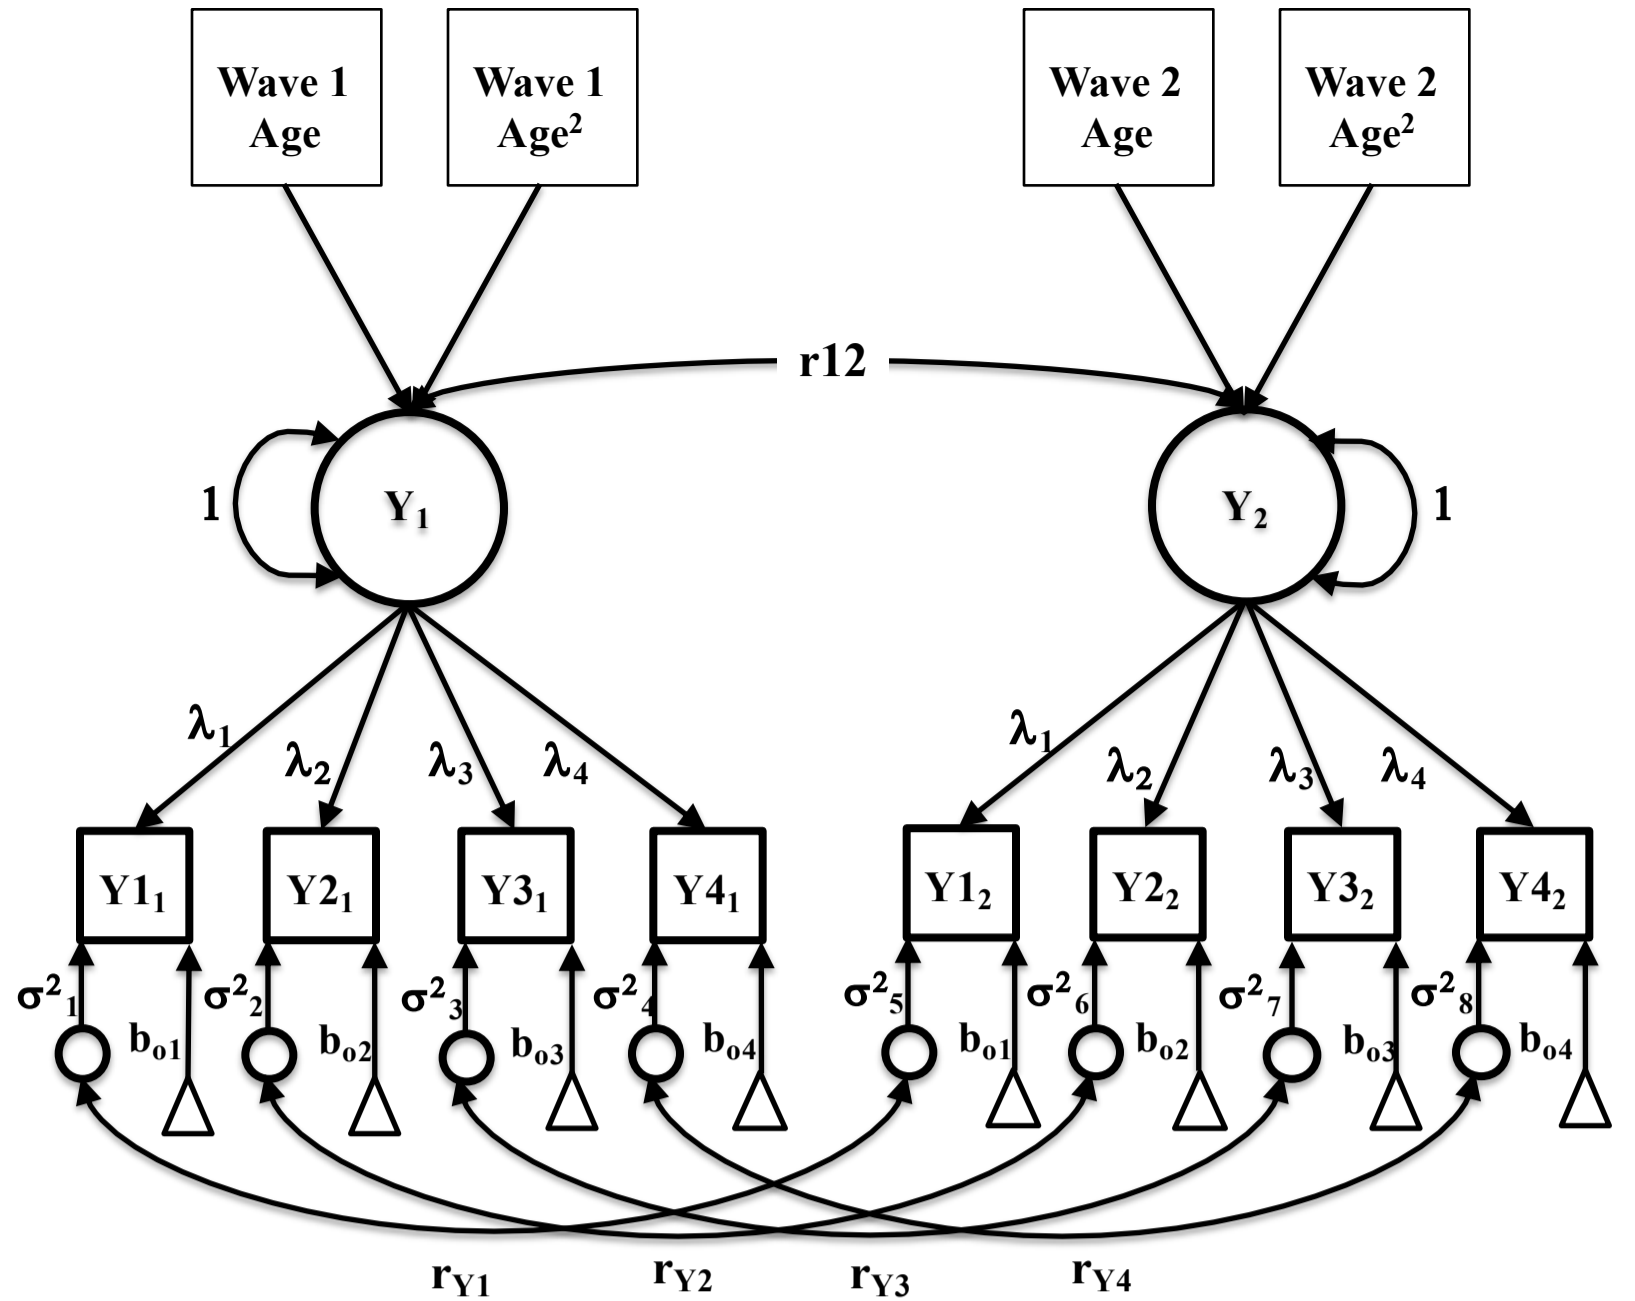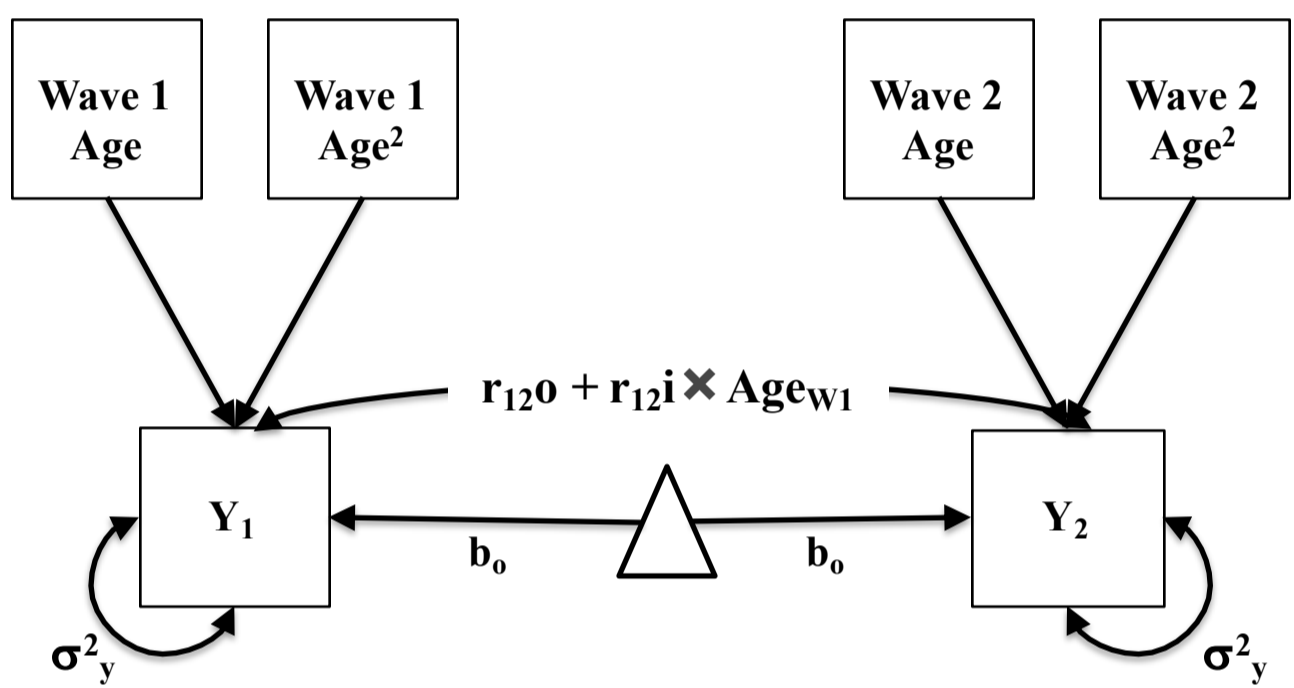

**B: Linear Age-Related Change In Stability**

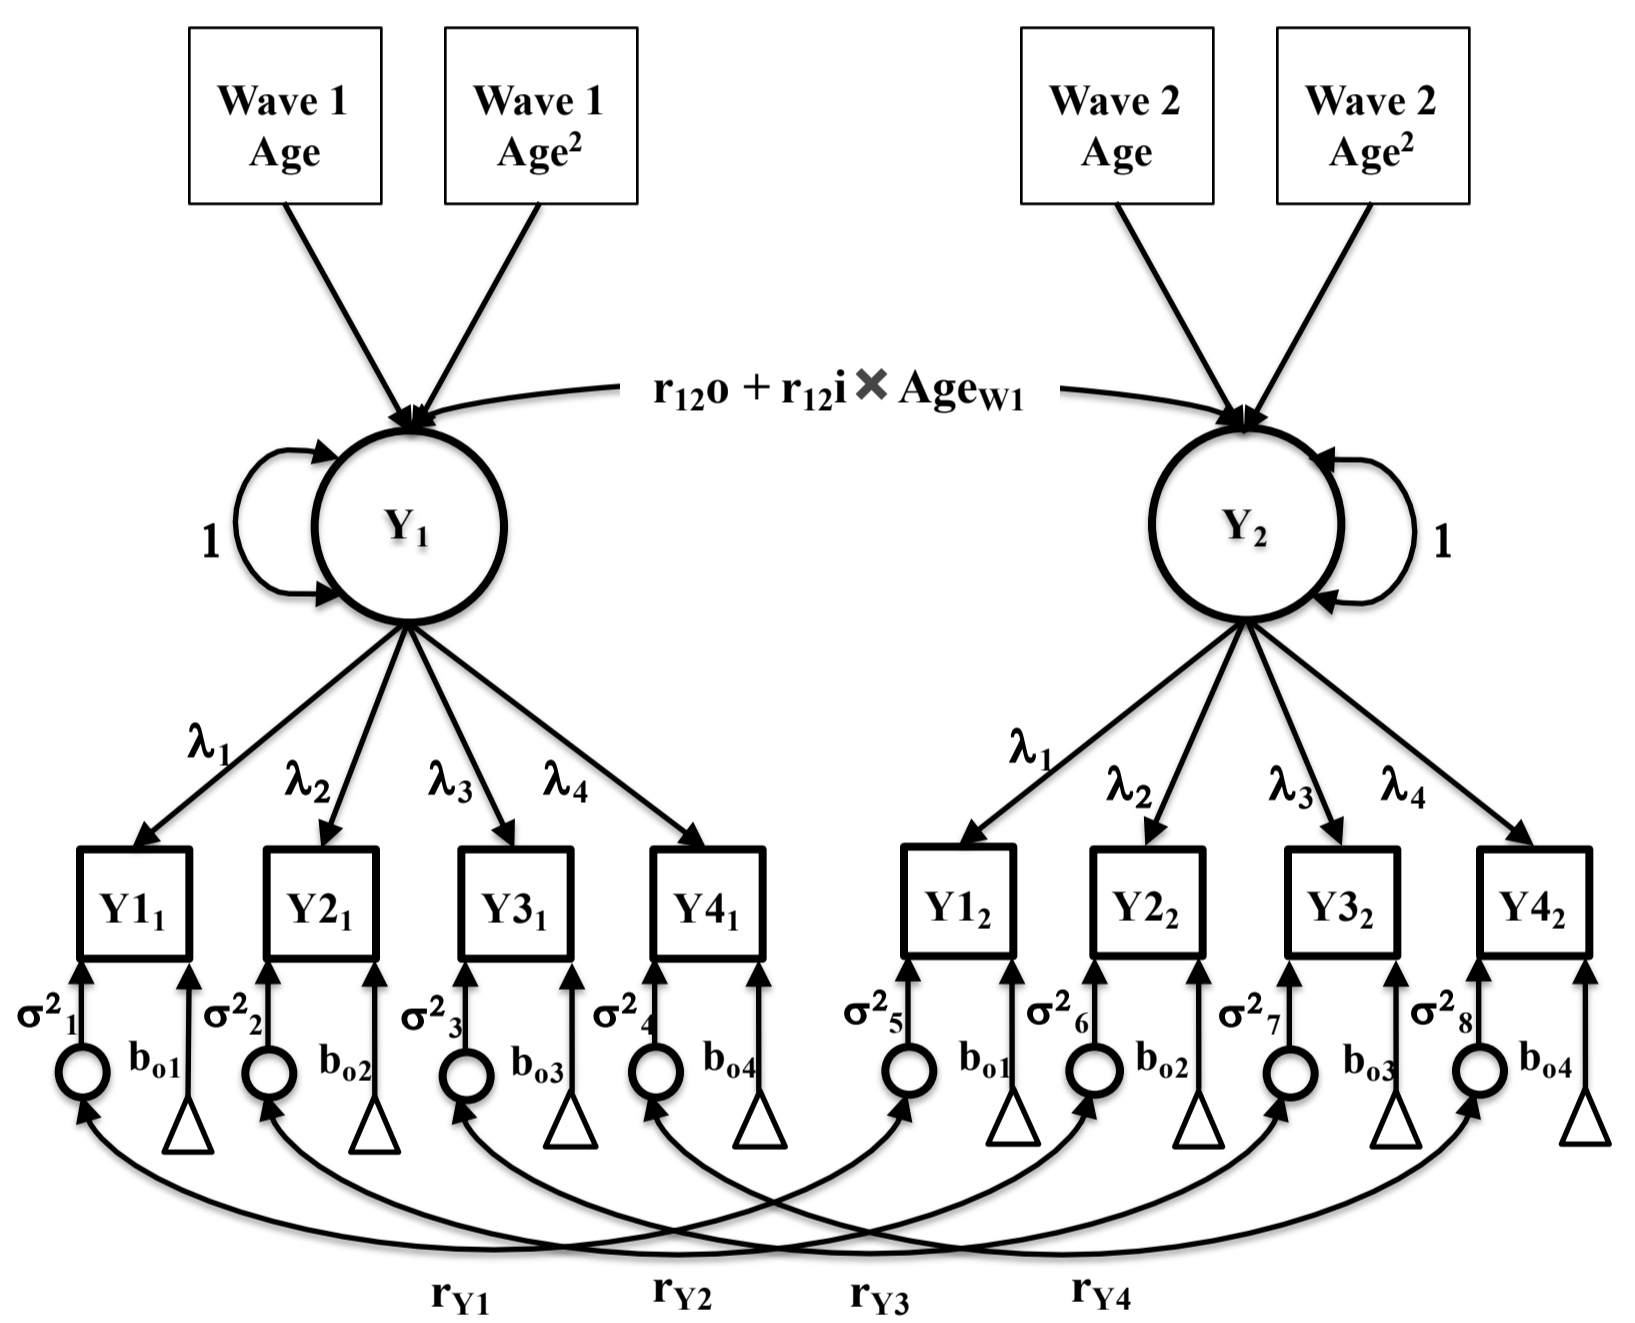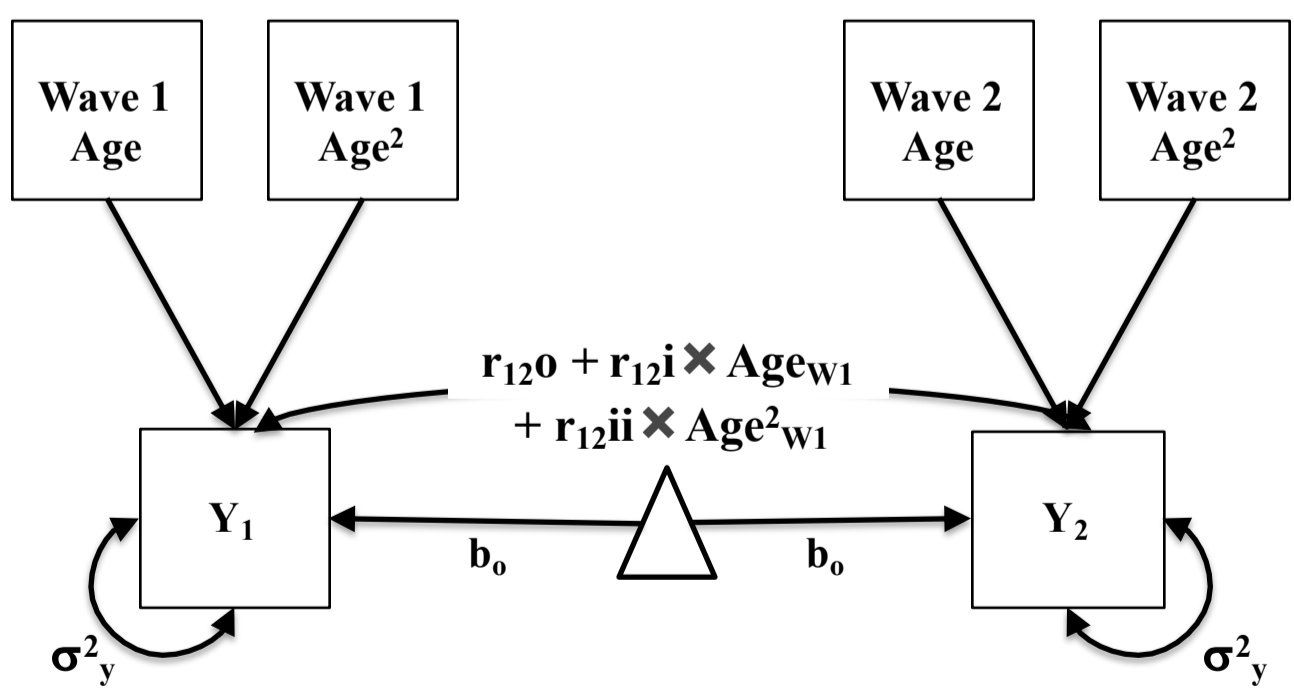

**C: Quadratic Age-Related Change In Stability**

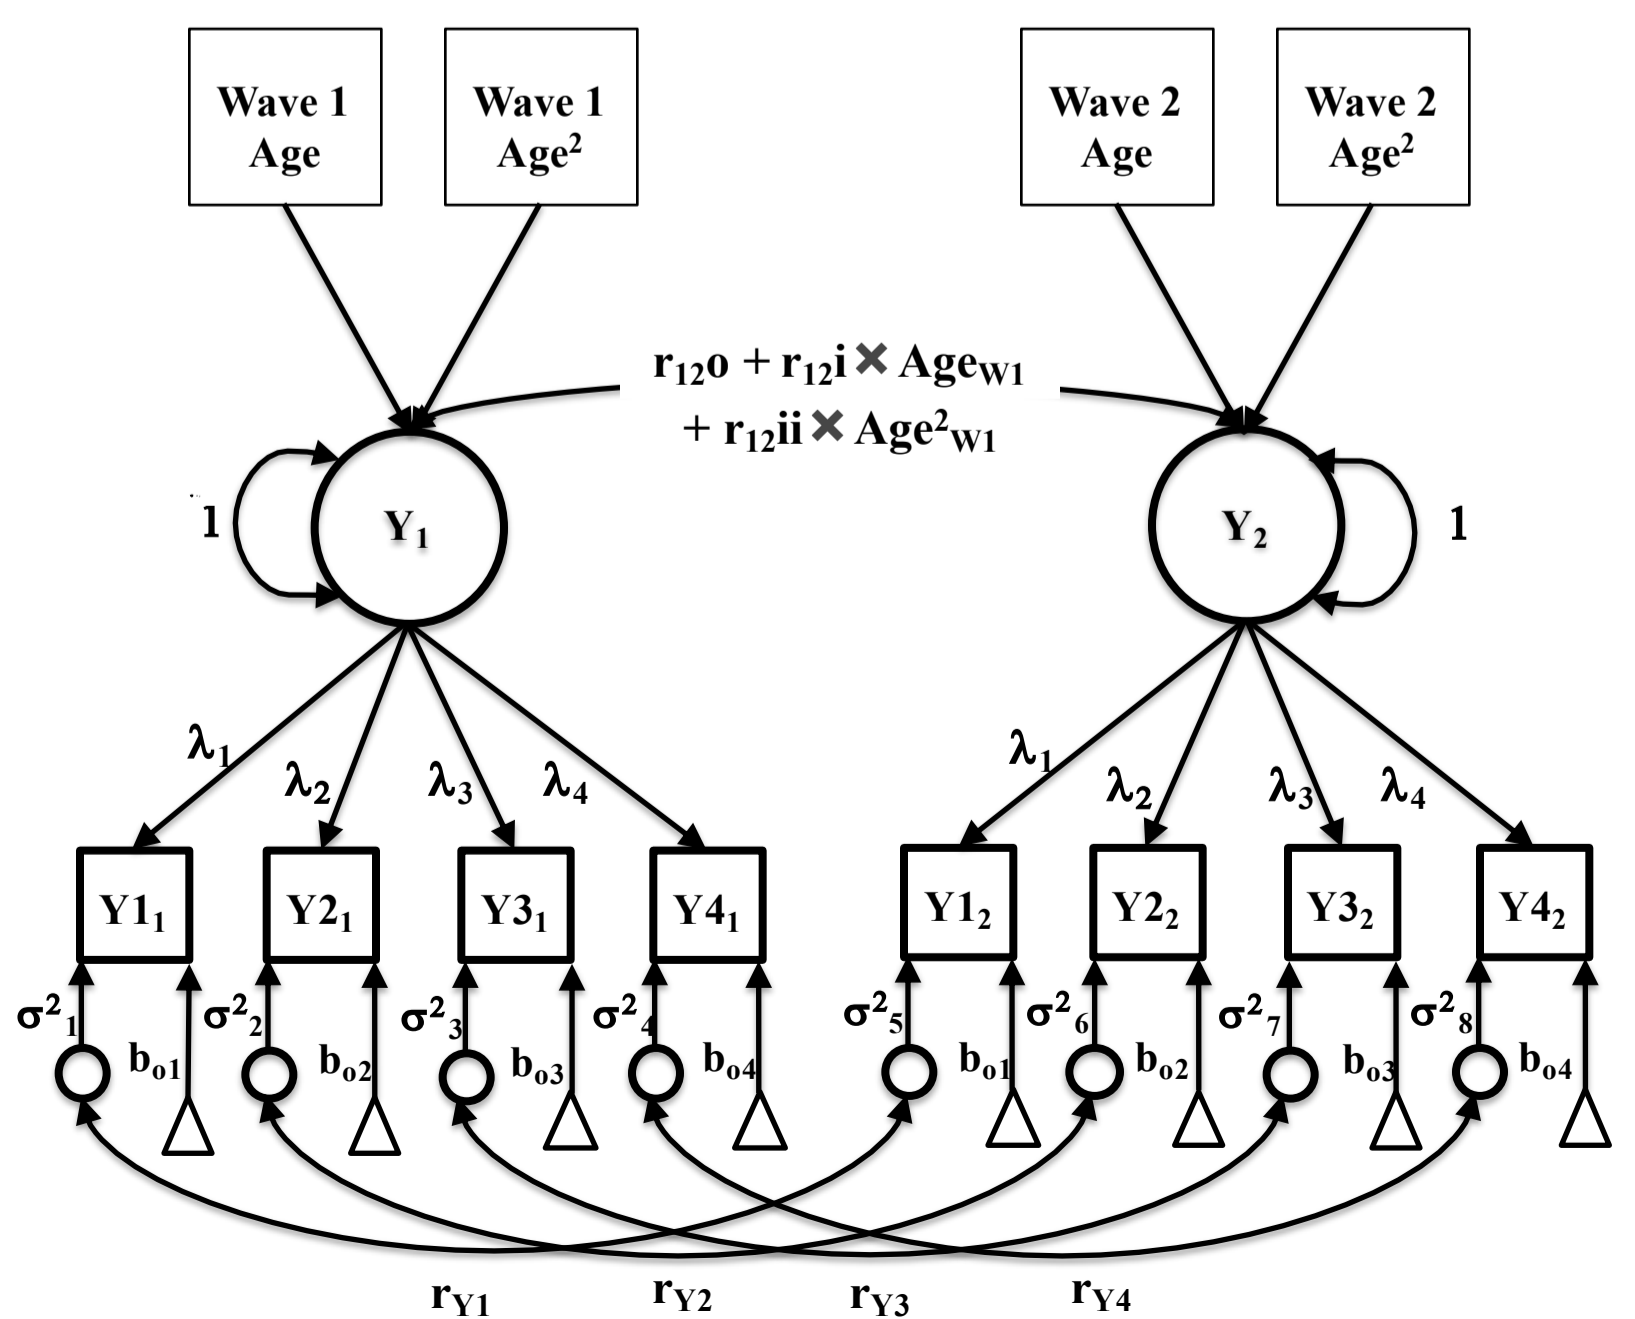

Supplement: NIHMS1571103-supplement-Supplement.pdf [file NIHMS1571103-supplement-Supplement.pdf]
